# Supplementary material
Source: PubMed Central journal article supplement (PMC2268568)
Supplement: pnas_0712200105_6.pdf [file pnas_0712200105_6.pdf]

### Bay-0 x Shahdara HYPOCOTYLS

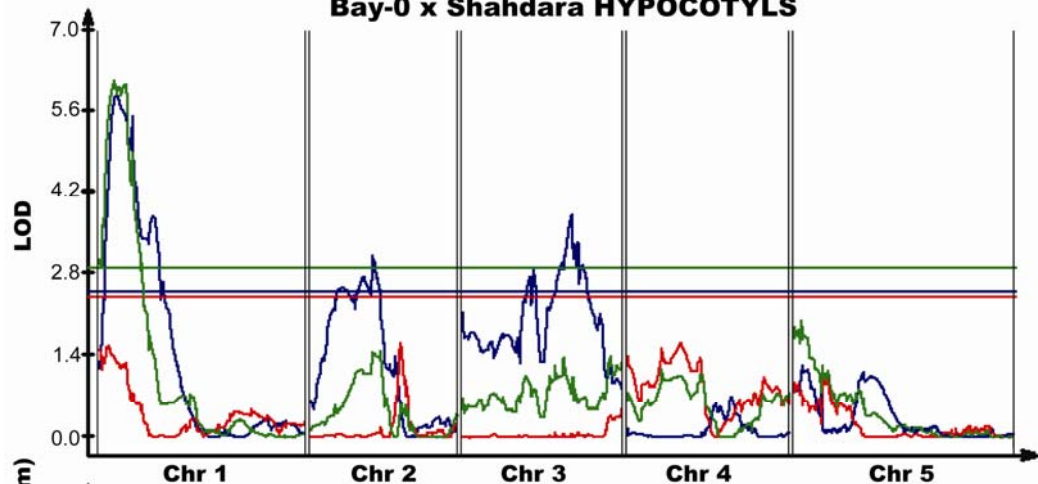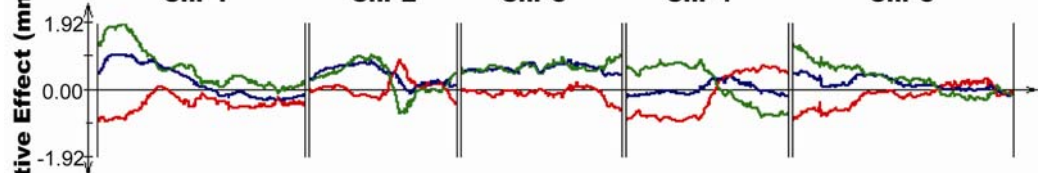

### Bay-0 x Shahdara ROOTS

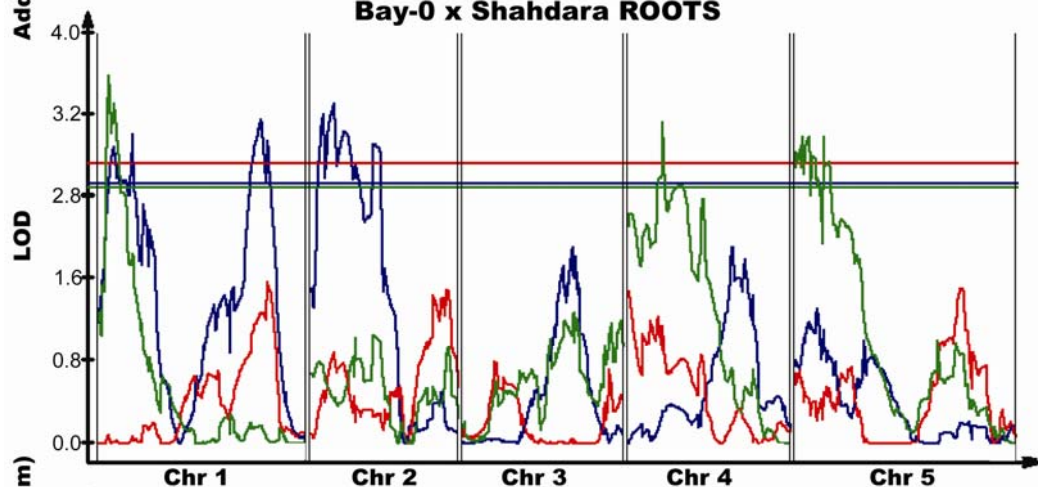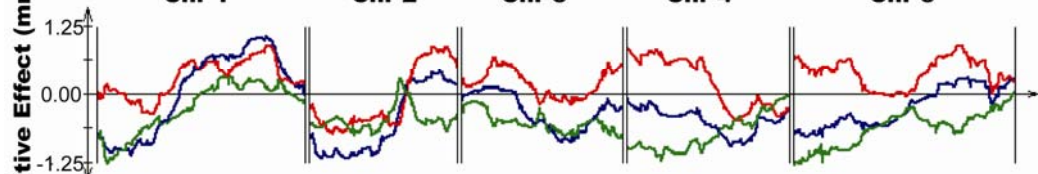

— HSP90 Inhibited  
— Control  
— Response to HSP90 Inhibition
