# Supplementary material
Source: PubMed Central journal article supplement (PMC2268568)
Supplement: pnas_0712200105_9.pdf [file pnas_0712200105_9.pdf]

### Bay-0 x Shahdara HYPOCOTYL DEVELOPMENTAL STABILITY

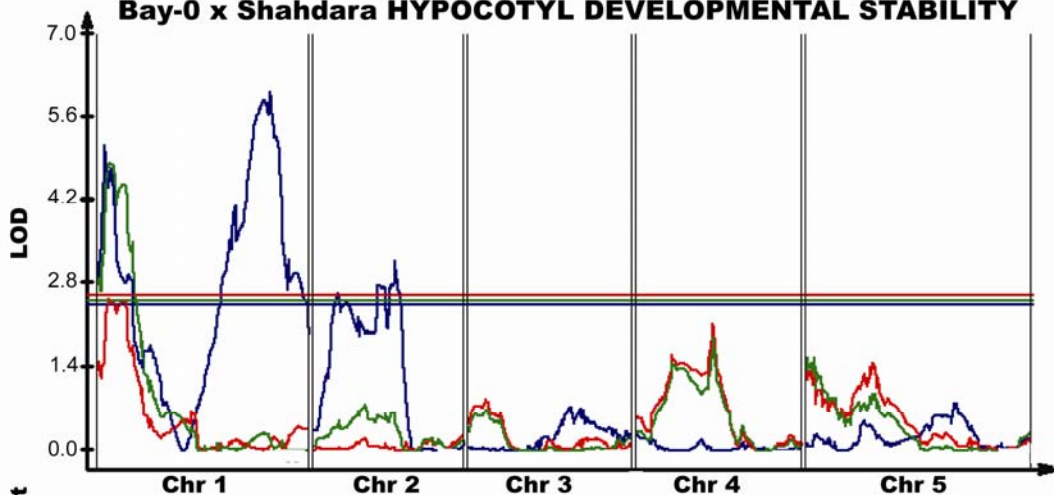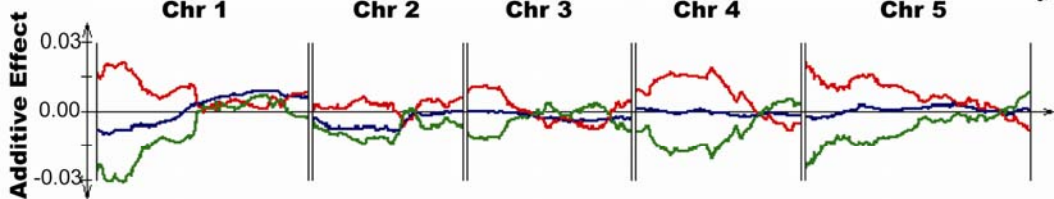

### Bay-0 x Shahdara ROOT DEVELOPMENTAL STABILITY

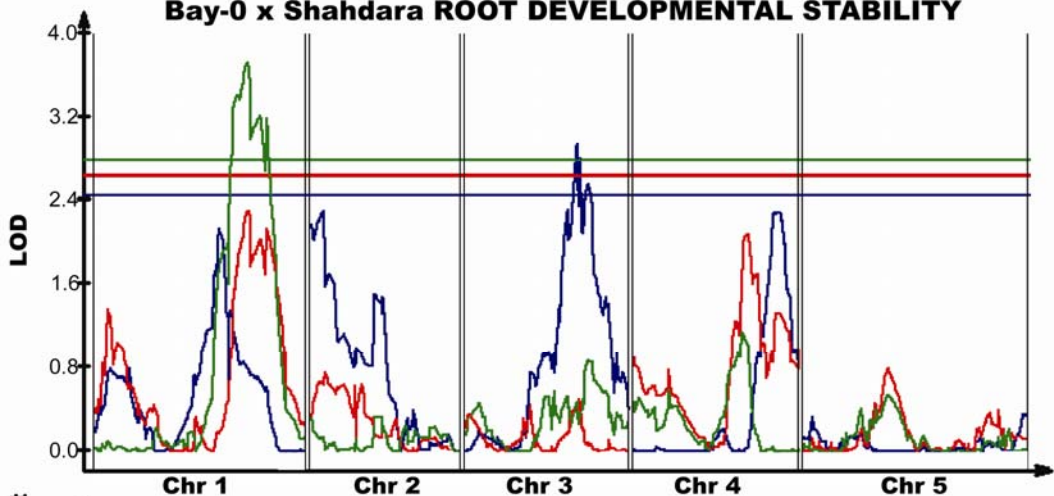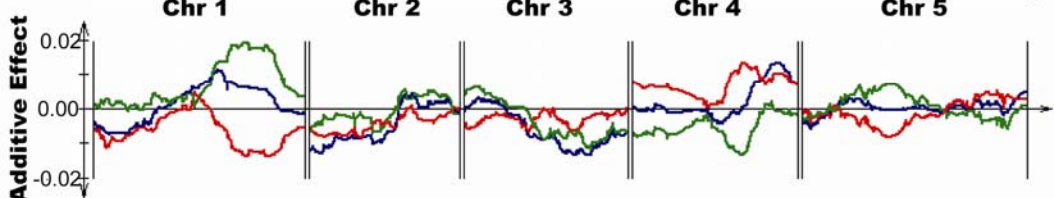

— HSP90 Inhibited  
— Control  
— Response to HSP90 Inhibition
