# Supplementary material
Source: PubMed Central journal article supplement (PMC2268568)

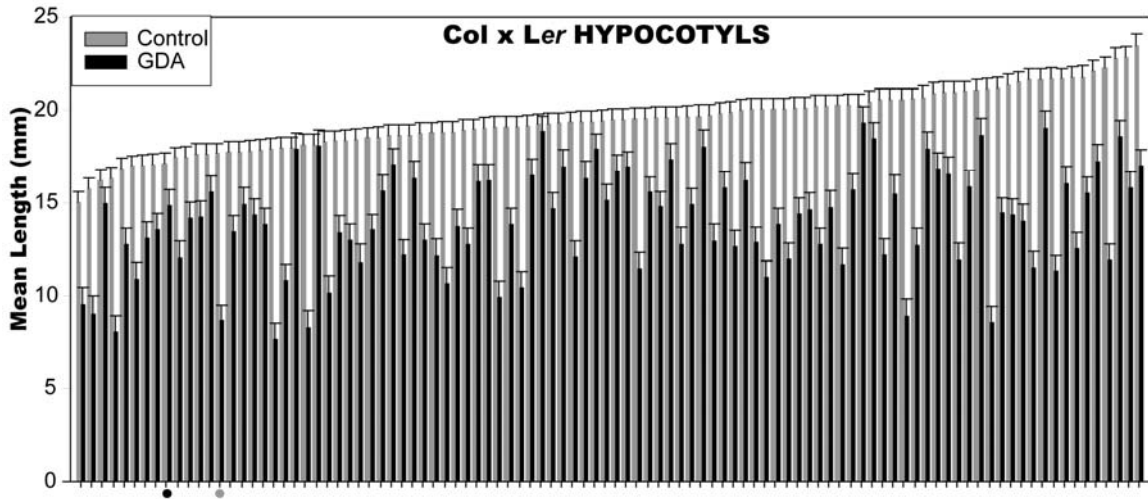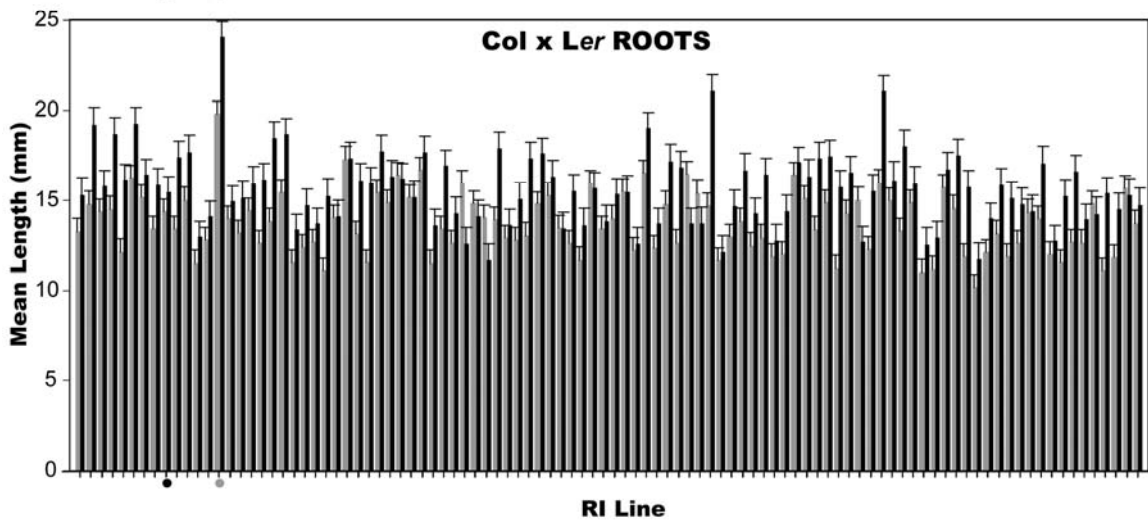

Supplement: pnas_0712200105_1.pdf [file pnas_0712200105_1.pdf]

### Col x Ler HYPOCOTYLS

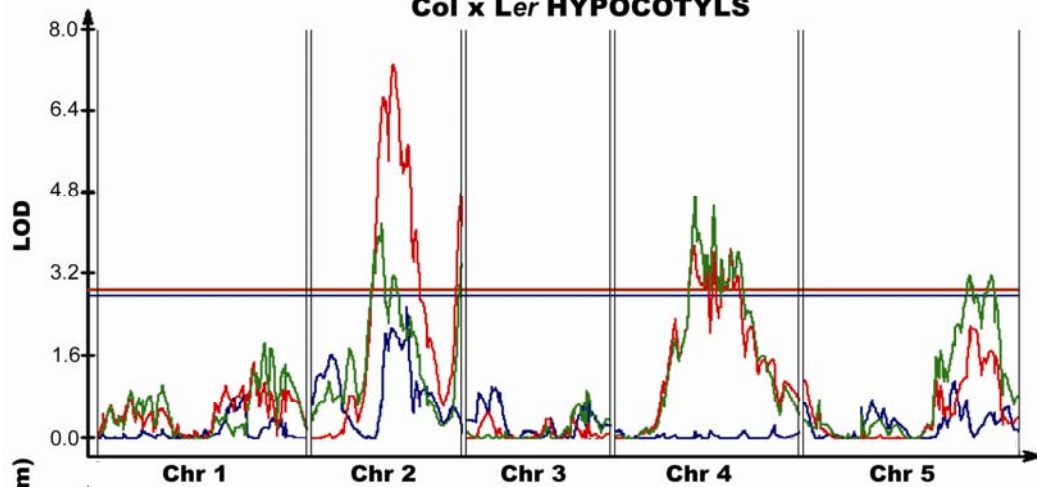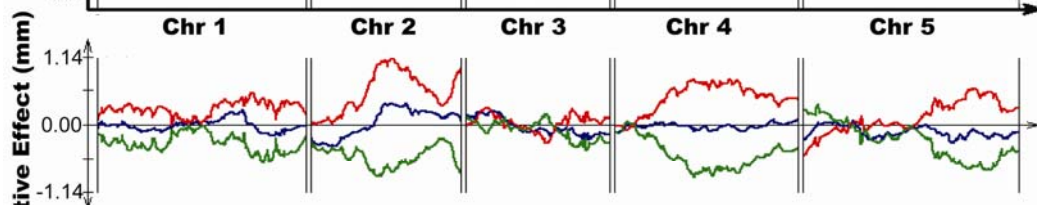

### Col x Ler ROOTS

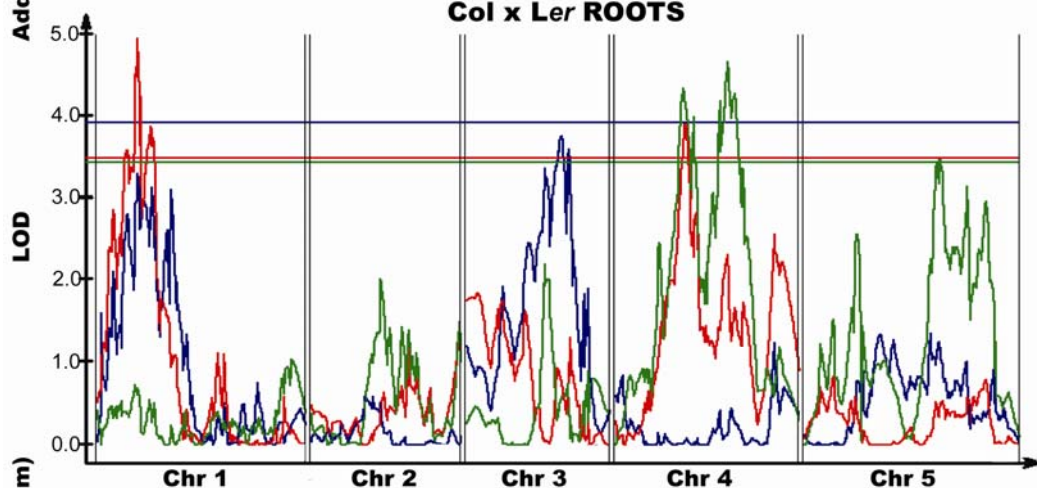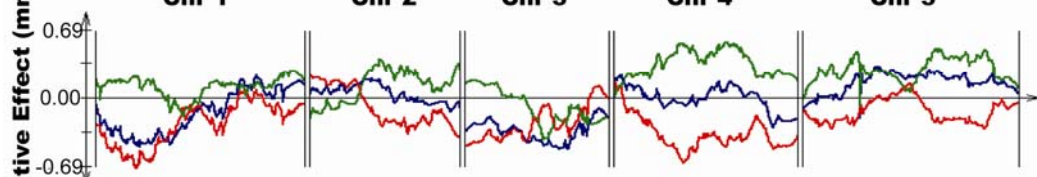

— HSP90 Inhibited  
— Control  
— Response to HSP90 Inhibition

Supplement: pnas_0712200105_2.pdf [file pnas_0712200105_2.pdf]

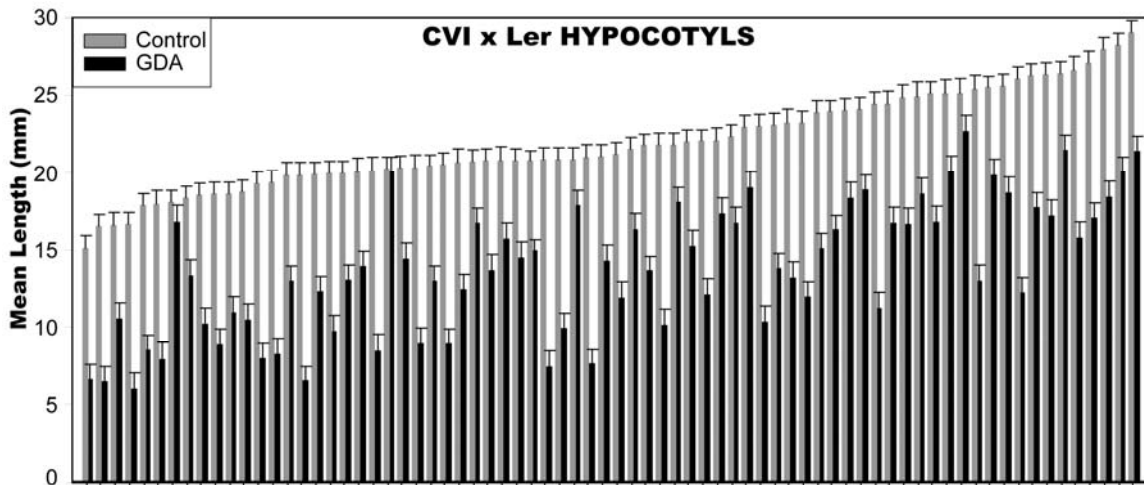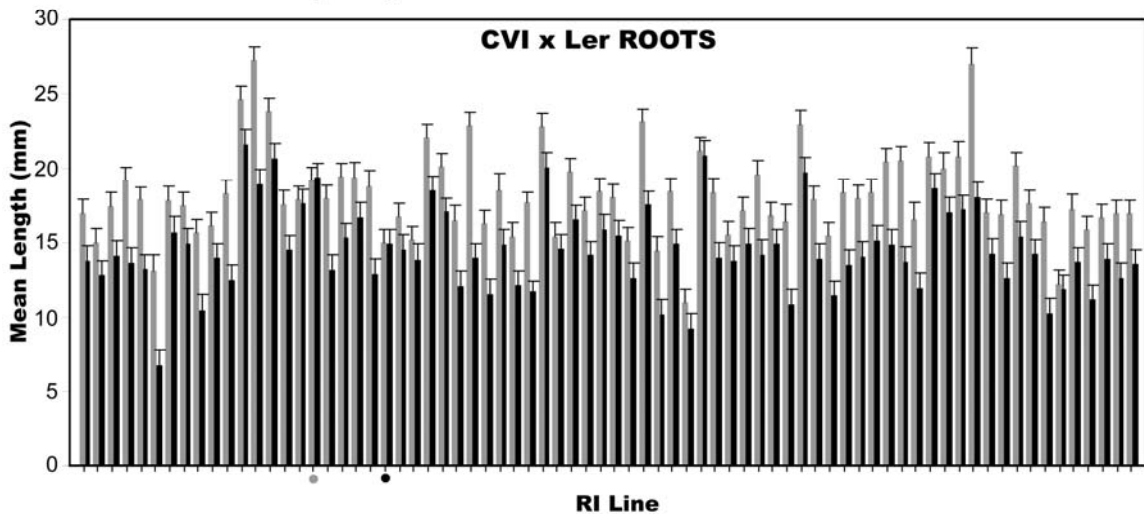

Supplement: pnas_0712200105_3.pdf [file pnas_0712200105_3.pdf]

### CVI x Ler HYPOCOTYLS

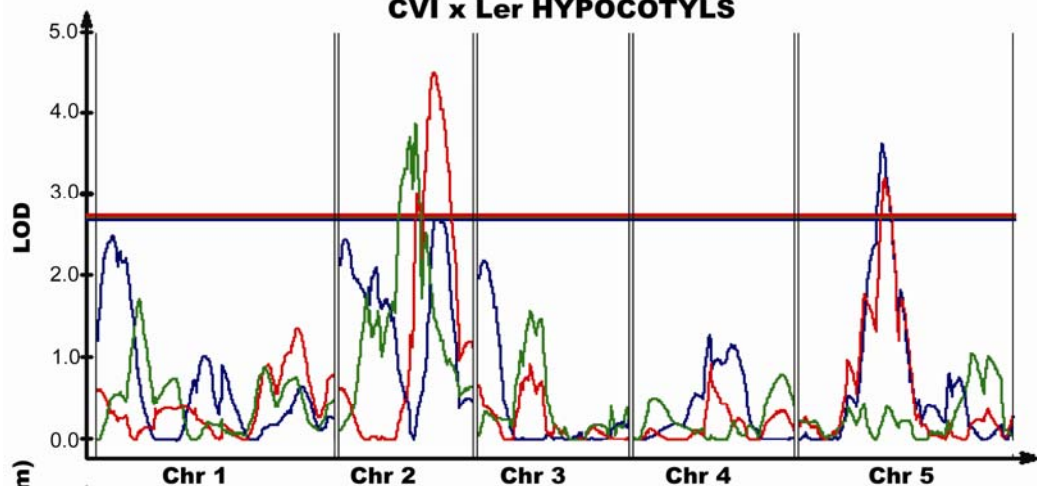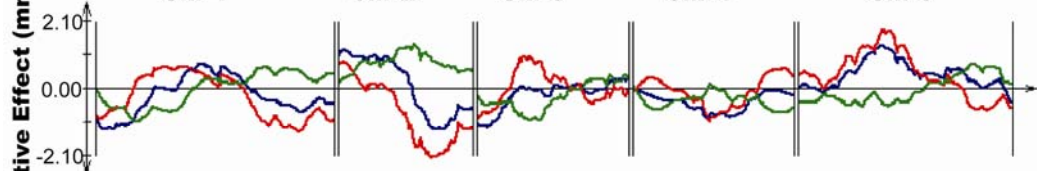

### CVI x Ler ROOTS

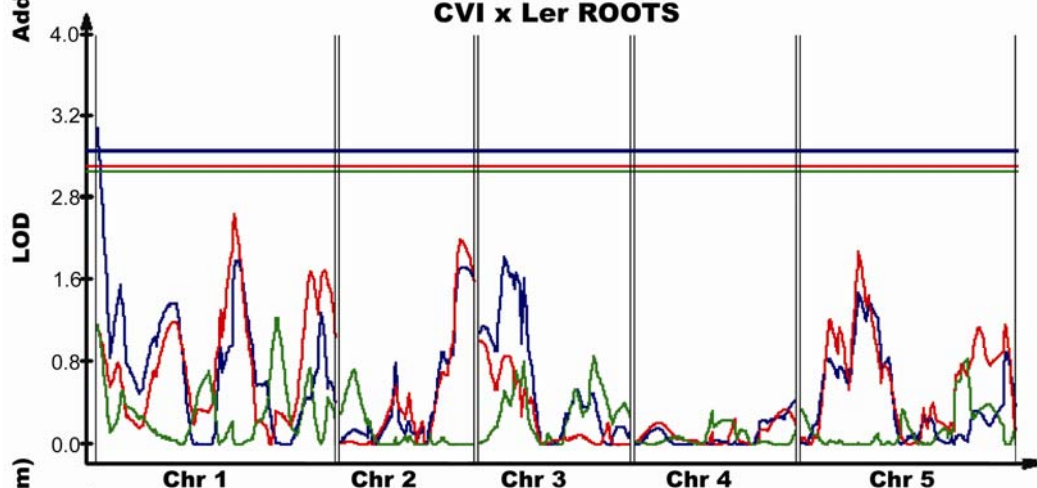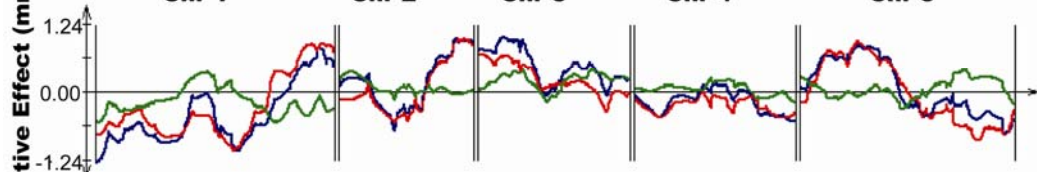

- HSP90 Inhibited
- Control
- Response to HSP90 Inhibition

Supplement: pnas_0712200105_4.pdf [file pnas_0712200105_4.pdf]

### Bay-0 x Shahdara HYPOCOTYLS

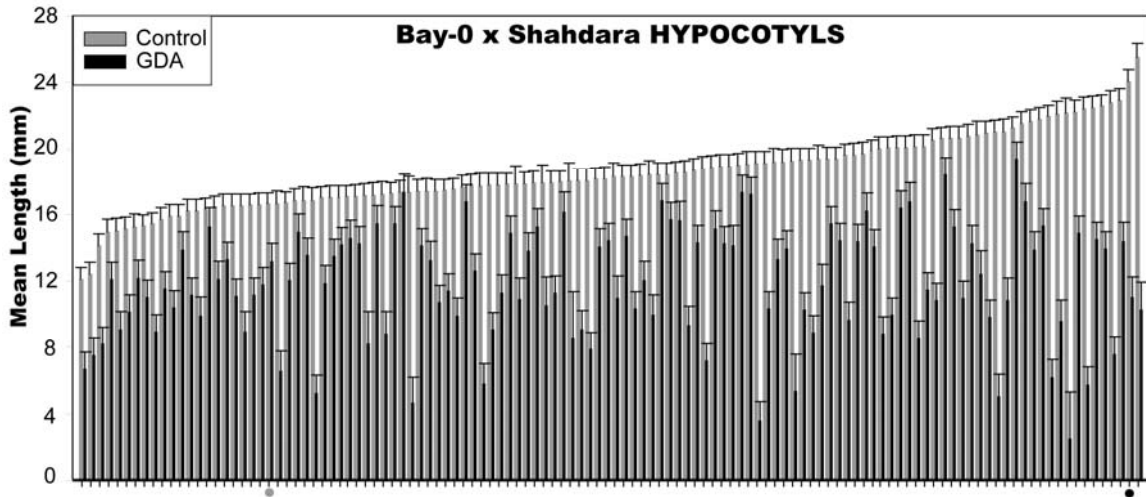

### Bay-0 x Shahdara ROOTS

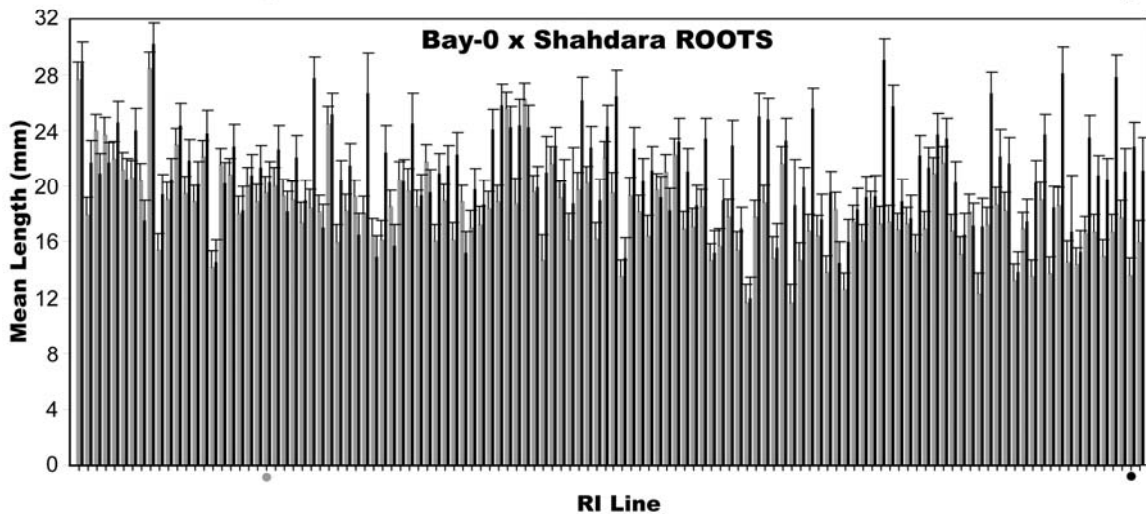

Supplement: pnas_0712200105_5.pdf [file pnas_0712200105_5.pdf]

### Col x Ler HYPOCOTYL DEVELOPMENTAL STABILITY

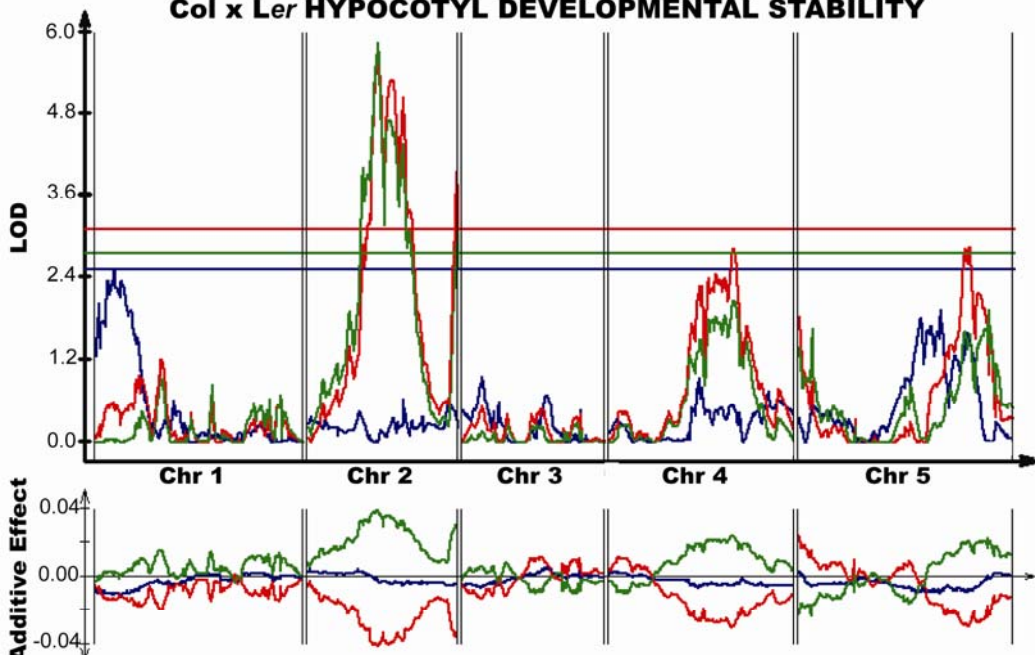

### Col x Ler ROOT DEVELOPMENTAL STABILITY

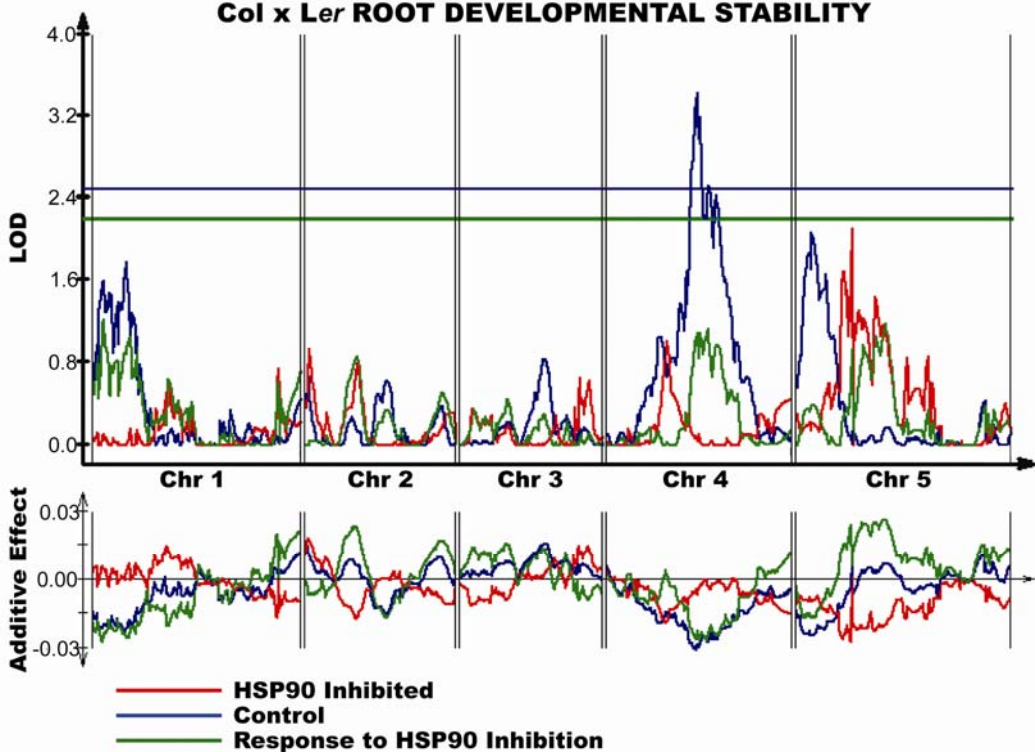

Supplement: pnas_0712200105_7.pdf [file pnas_0712200105_7.pdf]

# CVI x Ler HYPOCOTYL DEVELOPMENTAL STABILITY

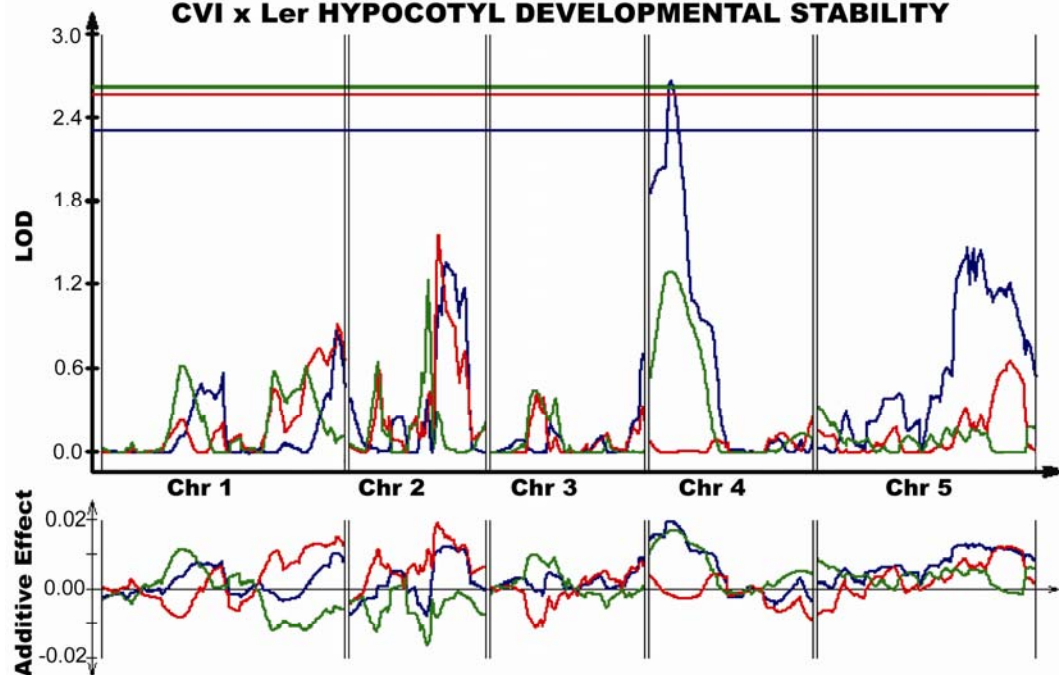

# CVI x Ler ROOT DEVELOPMENTAL STABILITY

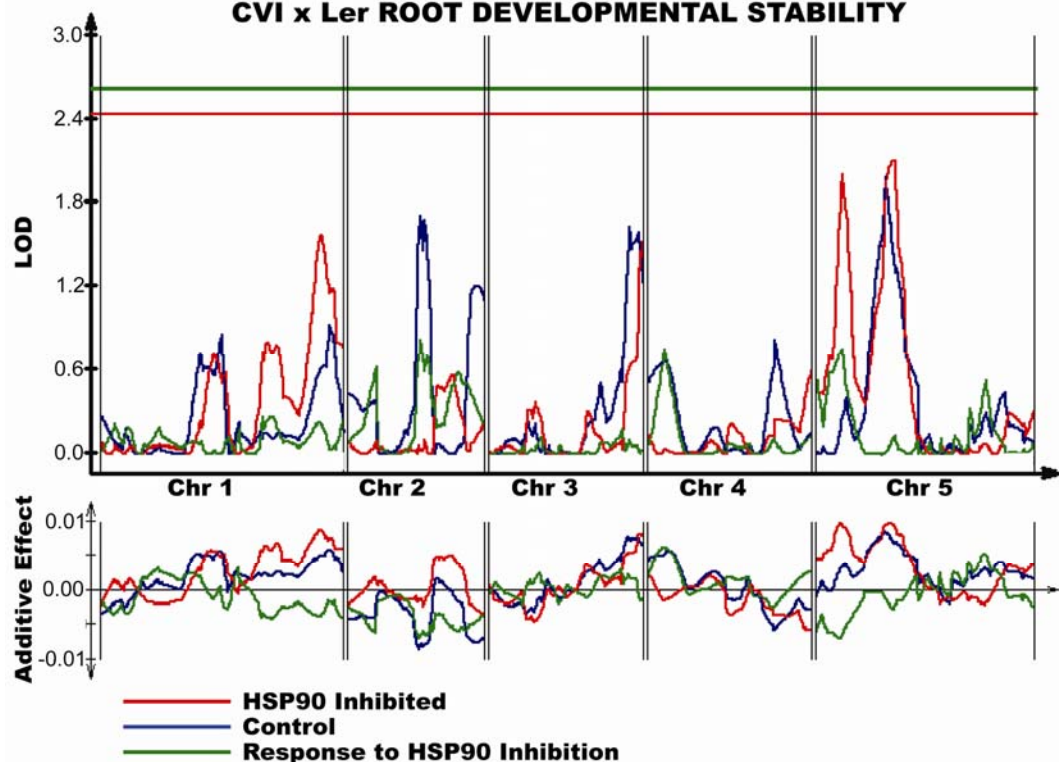

Supplement: pnas_0712200105_8.pdf [file pnas_0712200105_8.pdf]
